# Supplementary material
Source: Springer Nature journal article supplement (https://www.springermedizin.de/resource/supplementary/12993_2007_122_MOESM2_ESM.pdf/9617120)

**A**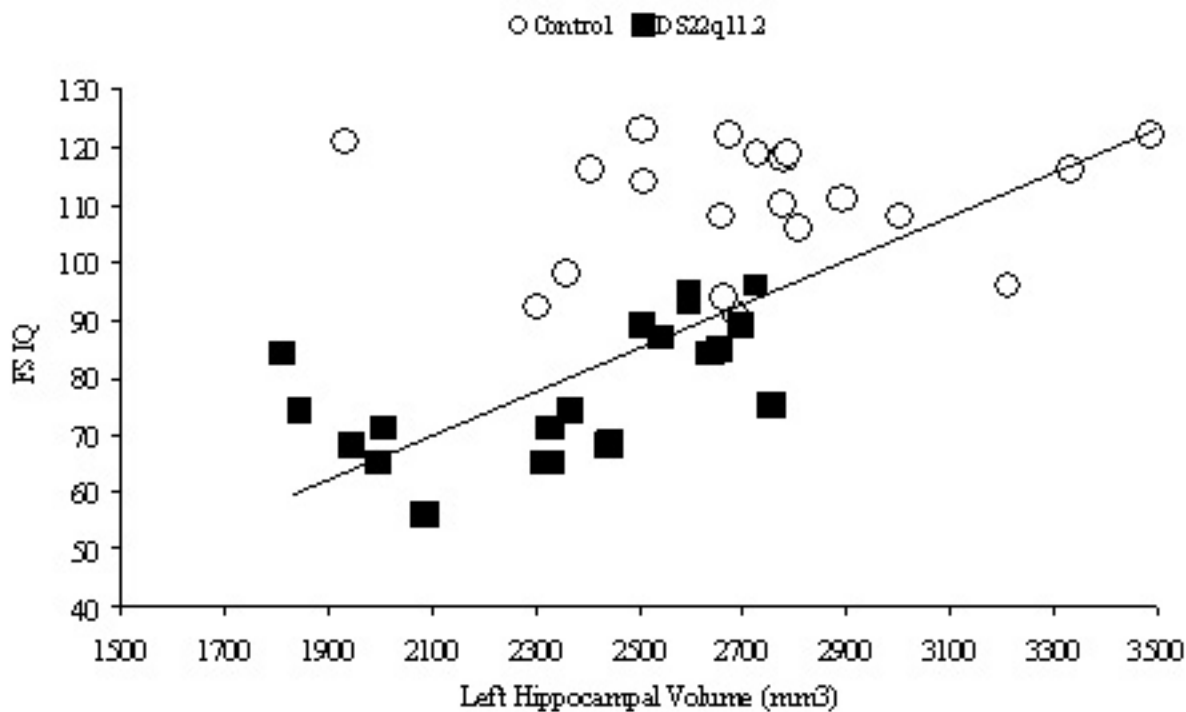**B**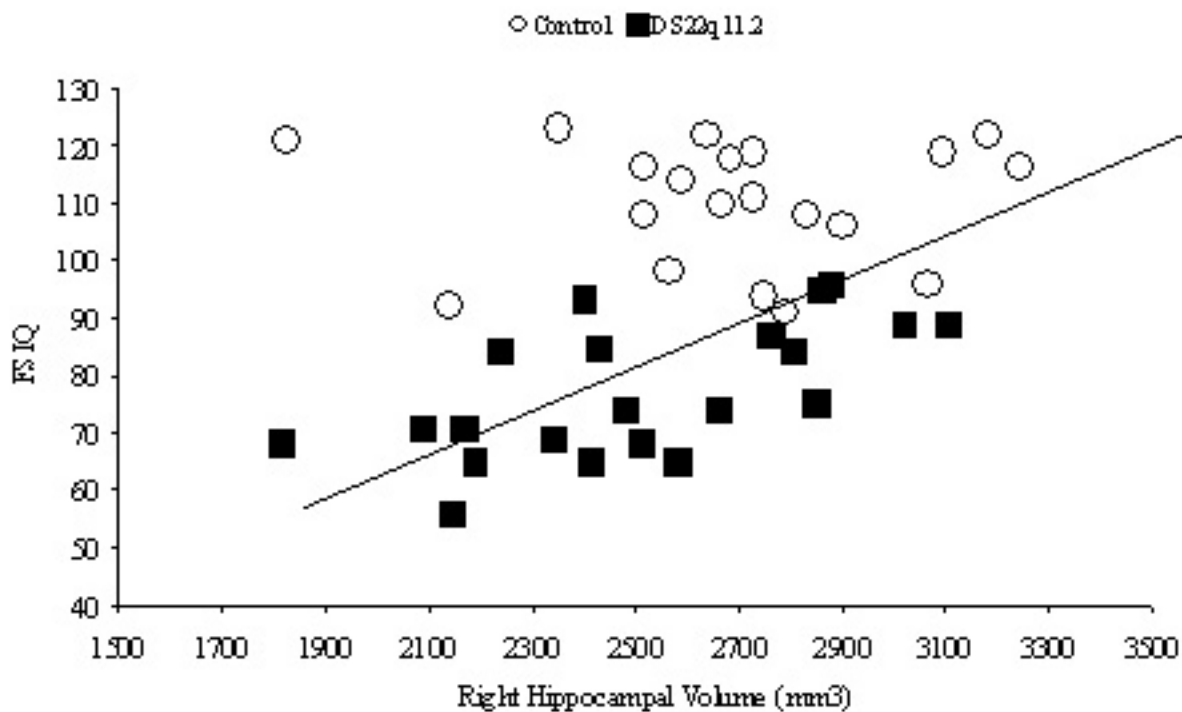

Supplement: MOESM2 [file 9617120]
